# Supplementary material
Source: Elsevier journal article supplement (http://fetal.org.il/mmc1.pdf)
Supplement: mmc1 [file mmc1.pdf]

## מומים של תעלת השידרה:

### מנינגומיאלוצלה – הסבר כללי למשפחות

#### הגדרה פשוטה:

מום פתוח של תעלת השידרה המתבטא באזור פתוח הנראה בגב התינוק.

#### מאפיינים:

חוסר סגירה של תעלת השידרה, חוסר בחלקים אחוריים של עמוד השידרה (חסר עצם), חסר בשרירים ובשומן התת עורי וחסר במידות שונות של העור שאמור לכסות את הגב.

#### מינוח רפואי:

מנינגומיאלוצלה MENINGOMYELOCELE, קיצור רפואי נפוץ – MMC.

#### משמעות:

הפגם בתעלה כולל חסר התפתחות של המרכיב הגרמי האחורי של עמוד השידרה (למינות ופרוצסוס ספינלי), דורה (הקרום העוטף בדרך כלל את המוח ואת חוט השידרה) פתוחה, בקיעת החומר העיצבי (חוט השידרה ועצבים המספקים בעיקרון עיצבוב לרגליים ולסוגרים – ואחראיים לתיפקוד תקין של מתן שתן וצואה).

הנוק הנורולוגי הצפוי תלוי בגודל ומיקום המום כאשר מנינגומיאלוצלה צוארי כמעט ואינם שורדים ומרבית התינוקות הנולדים עם MMC ידגימו מום נמוך בגב תחתון.

#### מה צפוי או עלול להיות הנוק מבחינה נירולוגית (עצבים):

הפתולוגיה הראשונית תתבטא בהפרעה מוטורית (תנועה) ותחושתית של הגפיים התחתונות (רגליים) אם המום מתחת לגובה המותניים.

מידת החולשה ברגליים יכולה לנוע מחולשה קלה המפריעה בדריכה של כף הרגל בשל עיוות או חולשה ממש, ועד שיתוק של הרגליים. יכול להיות הבדל בין תפקוד רגל אחת לשניה. אם קיים שימור של תנועה של הירכיים והשוקיים סיכוי מסויים שבעתיד בעזרת שיקום ושימוש במכשירים מתאימים ניתן יהיה להעמיד ואף להוליך את הילד.

#### הפרעה אורולוגית (שתן):

גם אם התינוק לאחר היוולדו יודע לתת שתן ללא צורך בקטטר - מרבית הילדים יצטרכו במשך השנה הראשונה לחייהם או לאחר מכן לעבור צינטור של כיס השתן. הפרוצדורה ניקראת קטטריזציה.

משמעותה: ריקון שלפוחית השתן על ידי קטטר.

בשנים הראשונות הפרוצדורה מבוצעת על ידי ההורים אך חלק גדול מן הילדים יכול ללמוד ולעשות זאת לבד בהמשך.  
חלק מן הילדים יסבלו משליטה על מתן צואה שתבטא בליכלוך מתמיד של החיתול או לחילופין בהמשך שילוב עם עצירות כרונית.

### **הפרעה אורטופדית:**

יכולה להיות מבחינת הגב או הרגליים.  
בגב: – תתבטא בעקמת מתקדמת.  
לא תמיד ניראית העקמת בשנים הראשונות לחיים אלא מופיעה או מחמירה בהמשך.  
המעקב האורטופדי חיוני. לעיתים החמרת העקמת תבטא ב- "עגינה מחדש" של חוט השידרה ותצריך ניתוח נירוכירורגי חוזר בגב לשחרור עגינה לפני טיפול כירורגי אורטופדי.  
רגליים: הפרעה בתנוחת רגליים בכף הרגל או באזור ירכיים.

הטיפול הרב ציוותי הכולל התייחסות שיקומית לכל ילד על פי מנת המשכל, המוטיבציה, והמגבלות הפיזיות – מאפשרים מיצוי הפוטנציאל של כל ילד.  
מעקב רב ציוותי זה נעשה בארץ בבית חולים אלן במסגרת מרפאת ספינה ביפידה שצברה ניסיון עצום בשנים האחרונות ובעבר בטיפול ילדים הסובלים מספינה ביפידה.

### **עוד בחודשים הבאים בנושא....**

מה הטיפול לאחר הלידה ב מום פתוח בגב (מנינגומיאלוצלה)?  
מהם הניתוחים הצפויים בילדים עם מום פתוח בגב מנינגומיאלוצלה?  
מה ההבדל בין מנינגומיאלוצלה ומנינגוצלה? האם תמיד יש בשק החיצוני עצבים?  
מה ההתפתחות השיכלית הצפויה בילדים עם MMC?  
הידרוצפלוס בילדים עם MMC.  
נושא הכיארי 2 – מבנה לא תקין של גומה אחורית עם צניחה של מרכיבים מן המוחון אל תעלת השידרה.

### **\*\*\*מילות מפתח לחיפוש ברשת האינטרנט:**

מום פתוח בגב  
מום פתוח של עמוד שידרה  
MENINGOMYELOCELE  
MMC  
הידרוצפלוס מולד  
כיארי 2  
CHIARI 2
